# Supplementary material for: Withania somnifera L.: Phenolic Compounds Composition and Biological Activity of Commercial Samples and Its Aqueous and Hydromethanolic Extracts
Source: MDPI journal article supplement (doi:10.3390/antiox12030550), 2023-02-22
Supplement: s1 [file s1]

**Table S1.** Acetylcholinesterase (AChE) and butyrylcholinesterase (BChE) activity (% comparing to control samples) after treatment by 9-Amino-1,2,3,4-tetrahydroacridine hydrochloride hydrate

| Concentration    | 0 $\mu$ M | 10 $\mu$ M | 15 $\mu$ M | 20 $\mu$ M | 25 $\mu$ M | 50 $\mu$ M |
|------------------|-----------|------------|------------|------------|------------|------------|
| AChE inhibition% | 100       | 32.1       | 23.6       | 19.4       | 15.0       | 9.0        |
| BChE inhibition% | 100       | 17.2       | 11.3       | 9.0        | 7.7        | 4.0        |

**Table S2.** Pearson's correlation analysis for the hydromethanolic extracts of the tested *W. somnifera* commercial samples.

|      | TPC          | TF            | TPA           | ASA           | DPPH          | ABTS         | FRAP          | GA           | CAT           | VA            | CA            | FA            | SYN          | pCA    | RUT          | Q             | NAR   | AChE         | BChE  |
|------|--------------|---------------|---------------|---------------|---------------|--------------|---------------|--------------|---------------|---------------|---------------|---------------|--------------|--------|--------------|---------------|-------|--------------|-------|
| TPC  | 1.000        |               |               |               |               |              |               |              |               |               |               |               |              |        |              |               |       |              |       |
| TF   | 0.222        | 1.000         |               |               |               |              |               |              |               |               |               |               |              |        |              |               |       |              |       |
| TPA  | <b>0.531</b> | 0.433         | 1.000         |               |               |              |               |              |               |               |               |               |              |        |              |               |       |              |       |
| ASA  | <b>0.486</b> | <b>0.520</b>  | <b>0.746</b>  | 1.000         |               |              |               |              |               |               |               |               |              |        |              |               |       |              |       |
| DPPH | -0.189       | <b>-0.474</b> | <b>-0.482</b> | <b>-0.672</b> | 1.000         |              |               |              |               |               |               |               |              |        |              |               |       |              |       |
| ABTS | <b>0.582</b> | 0.291         | 0.881         | <b>0.787</b>  | -0.351        | 1.000        |               |              |               |               |               |               |              |        |              |               |       |              |       |
| FRAP | 0.446        | <b>0.740</b>  | <b>0.564</b>  | <b>0.505</b>  | -0.333        | <b>0.537</b> | 1.000         |              |               |               |               |               |              |        |              |               |       |              |       |
| GA   | -0.097       | 0.415         | <b>0.513</b>  | <b>0.555</b>  | <b>-0.483</b> | 0.394        | 0.323         | 1.000        |               |               |               |               |              |        |              |               |       |              |       |
| CAT  | 0.234        | <b>0.863</b>  | 0.368         | 0.380         | -0.381        | 0.226        | <b>0.871</b>  | 0.439        | 1.000         |               |               |               |              |        |              |               |       |              |       |
| VA   | 0.261        | -0.094        | 0.010         | 0.215         | -0.150        | 0.142        | -0.261        | -0.342       | -0.320        | 1.000         |               |               |              |        |              |               |       |              |       |
| CA   | 0.440        | <b>0.622</b>  | <b>0.567</b>  | 0.289         | -0.281        | 0.447        | <b>0.849</b>  | 0.177        | <b>0.734</b>  | -0.272        | 1.000         |               |              |        |              |               |       |              |       |
| FA   | -0.095       | 0.212         | 0.093         | -0.152        | -0.133        | -0.155       | 0.288         | 0.407        | <b>0.488</b>  | -0.465        | 0.274         | 1.000         |              |        |              |               |       |              |       |
| SYN  | <b>0.689</b> | <b>0.513</b>  | <b>0.682</b>  | <b>0.804</b>  | -0.357        | <b>0.769</b> | <b>0.683</b>  | <b>0.528</b> | <b>0.536</b>  | 0.030         | 0.426         | 0.061         | 1.000        |        |              |               |       |              |       |
| pCA  | 0.405        | <b>0.613</b>  | <b>0.780</b>  | <b>0.800</b>  | <b>-0.623</b> | <b>0.679</b> | <b>0.659</b>  | <b>0.803</b> | <b>0.643</b>  | -0.206        | <b>0.573</b>  | 0.268         | <b>0.783</b> | 1.000  |              |               |       |              |       |
| RUT  | <b>0.489</b> | 0.133         | 0.169         | 0.259         | <b>-0.533</b> | 0.140        | 0.283         | 0.147        | 0.260         | 0.150         | 0.201         | 0.359         | 0.404        | 0.304  | 1.000        |               |       |              |       |
| Q    | -0.116       | 0.409         | 0.042         | -0.122        | 0.031         | 0.009        | <b>0.640</b>  | -0.026       | <b>0.610</b>  | <b>-0.473</b> | <b>0.743</b>  | 0.231         | -0.039       | 0.157  | -0.158       | 1.000         |       |              |       |
| NAR  | 0.465        | 0.128         | 0.250         | 0.273         | <b>-0.560</b> | 0.156        | 0.227         | 0.171        | 0.202         | 0.120         | 0.179         | 0.360         | 0.343        | 0.314  | <b>0.961</b> | -0.211        | 1.000 |              |       |
| AChE | 0.185        | -0.289        | -0.098        | 0.162         | -0.002        | 0.039        | <b>-0.552</b> | -0.145       | <b>-0.591</b> | <b>0.556</b>  | <b>-0.546</b> | <b>-0.514</b> | 0.002        | -0.141 | 0.018        | <b>-0.725</b> | 0.039 | 1.000        |       |
| BChE | -0.105       | -0.127        | -0.127        | 0.110         | -0.347        | -0.134       | -0.403        | 0.167        | -0.221        | 0.307         | -0.282        | -0.132        | -0.147       | 0.136  | 0.106        | -0.337        | 0.122 | <b>0.562</b> | 1.000 |

Statistically significant correlations ( $p < 0.05$ ) are in bold.

TPC: total phenolic compounds, TF: total flavonoids, TPA: total phenolic acids, ASA: L(+) ascorbic acid, DPPH: 2,2-diphenyl-1-picryl-hydrazyl assay, ABTS: 2,2'-azinobis-(3-ethylbenzothiazoline-6-sulfonate) assay, FRAP: ferric reducing antioxidant power assay, GA-gallic 331 acid, CAT-catechin, VA-vanilic acid, CA-caffeic acid, pCA-p-coumaric acid, FA-ferulic acid, SYN – sinapinic acid, RUT-rutin, Q-quercetin, NAR- naringenin, AChE: acetylcholinesterase inhibitory activity, BChE: butyrylcholinesterase inhibitory activity.

**Table S3.** Pearson's correlation analysis for the aqueous extracts of the tested *W. somnifera* commercial samples.

|      | TPC          | TF           | TPA           | ASA          | DPPH         | ABTS         | FRAP          | GA            | CAT           | VA           | CA           | FA           | SYN    | pCA          | RUT    | Q             | NAR    | AChE  | BChE  |
|------|--------------|--------------|---------------|--------------|--------------|--------------|---------------|---------------|---------------|--------------|--------------|--------------|--------|--------------|--------|---------------|--------|-------|-------|
| TPC  | 1.000        |              |               |              |              |              |               |               |               |              |              |              |        |              |        |               |        |       |       |
| TF   | 0.286        | 1.000        |               |              |              |              |               |               |               |              |              |              |        |              |        |               |        |       |       |
| TPA  | <b>0.635</b> | -0.061       | 1.000         |              |              |              |               |               |               |              |              |              |        |              |        |               |        |       |       |
| ASA  | 0.113        | -0.252       | 0.293         | 1.000        |              |              |               |               |               |              |              |              |        |              |        |               |        |       |       |
| DPPH | 0.222        | 0.318        | -0.212        | 0.021        | 1.000        |              |               |               |               |              |              |              |        |              |        |               |        |       |       |
| ABTS | 0.445        | 0.075        | <b>0.565</b>  | -0.214       | -0.114       | 1.000        |               |               |               |              |              |              |        |              |        |               |        |       |       |
| FRAP | 0.401        | -0.461       | <b>0.591</b>  | 0.254        | 0.039        | 0.289        | 1.000         |               |               |              |              |              |        |              |        |               |        |       |       |
| GA   | 0.286        | 0.092        | 0.436         | 0.211        | -0.121       | 0.199        | 0.321         | 1.000         |               |              |              |              |        |              |        |               |        |       |       |
| CAT  | <b>0.628</b> | -0.128       | <b>0.720</b>  | 0.375        | -0.137       | 0.418        | <b>0.783</b>  | <b>0.482</b>  | 1.000         |              |              |              |        |              |        |               |        |       |       |
| VA   | <b>0.622</b> | 0.201        | <b>0.623</b>  | 0.319        | 0.466        | 0.335        | 0.371         | 0.018         | 0.396         | 1.000        |              |              |        |              |        |               |        |       |       |
| CA   | 0.404        | 0.069        | <b>0.588</b>  | <b>0.592</b> | 0.013        | 0.110        | 0.256         | <b>0.533</b>  | 0.450         | <b>0.577</b> | 1.000        |              |        |              |        |               |        |       |       |
| FA   | <b>0.599</b> | 0.136        | <b>0.690</b>  | 0.284        | -0.144       | 0.231        | 0.404         | <b>0.653</b>  | <b>0.654</b>  | 0.287        | <b>0.590</b> | 1.000        |        |              |        |               |        |       |       |
| SYN  | 0.167        | 0.404        | -0.067        | 0.256        | <b>0.625</b> | -0.055       | 0.176         | -0.062        | 0.221         | 0.425        | 0.079        | -0.004       | 1.000  |              |        |               |        |       |       |
| pCA  | <b>0.743</b> | 0.348        | <b>0.692</b>  | 0.166        | -0.139       | <b>0.480</b> | 0.197         | 0.415         | <b>0.635</b>  | <b>0.499</b> | <b>0.537</b> | <b>0.595</b> | 0.046  | 1.000        |        |               |        |       |       |
| RUT  | <b>0.672</b> | -0.039       | <b>0.824</b>  | 0.249        | -0.083       | 0.424        | 0.464         | 0.172         | <b>0.521</b>  | <b>0.670</b> | <b>0.614</b> | <b>0.639</b> | -0.002 | <b>0.611</b> | 1.000  |               |        |       |       |
| Q    | -0.176       | <b>0.588</b> | <b>-0.637</b> | -0.408       | 0.345        | -0.329       | <b>-0.614</b> | -0.145        | <b>-0.611</b> | -0.286       | -0.226       | -0.220       | 0.046  | -0.350       | -0.448 | 1.000         |        |       |       |
| NAR  | -0.201       | 0.079        | -0.115        | -0.062       | -0.304       | 0.036        | -0.103        | -0.014        | -0.195        | -0.229       | -0.042       | -0.059       | -0.151 | -0.059       | -0.035 | 0.238         | 1.000  |       |       |
| AChE | -0.234       | -0.432       | 0.178         | 0.123        | -0.376       | 0.269        | 0.031         | <b>-0.506</b> | -0.015        | 0.025        | -0.139       | -0.145       | -0.076 | -0.121       | 0.286  | <b>-0.475</b> | 0.011  | 1.000 |       |
| BChE | 0.263        | 0.045        | 0.216         | 0.372        | 0.140        | 0.193        | -0.127        | -0.175        | 0.134         | <b>0.469</b> | 0.164        | 0.013        | 0.246  | 0.442        | 0.191  | -0.397        | -0.234 | 0.290 | 1.000 |

Statistically significant correlations ( $p < 0.05$ ) are in bold

TPC: total phenolic compounds, TF: total flavonoids, TPA: total phenolic acids, ASA: L(+) ascorbic acid, DPPH: 2,2-diphenyl-1-picryl-hydrazyl assay, ABTS: 2,2'-azinobis-(3-ethylbenzothiazoline-6-sulfonate) assay, FRAP: ferric reducing antioxidant power assay, GA-gallic 331 acid, CAT-catechin, VA-vanilic acid, CA-caffeic acid, pCA-p-coumaric acid, FA-ferulic acid, SYN – sinapinic acid, RUT-rutin, Q-quercetin, NAR- naringenin, AChE: acetylcholinesterase inhibitory activity, BChE: butyrylcholinesterase inhibitory activity.
